# Supplementary material for: Polyubiquitin Is Required for Growth, Development and Pathogenicity in the Rice Blast Fungus Magnaporthe oryzae
Source: PLoS One. 2012 Aug 10;7(8):e42868. doi: 10.1371/journal.pone.0042868 (PMC3416782; doi:10.1371/journal.pone.0042868)
Supplement: Table S1 — Primer sequences for gene specific replacement cassette construction. (XLS) [file pone.0042868.s003.xls]

## Sheet: MGG_01282 Knockout_primer_table
Table S1. Primer sequences for gene specific replacement cassette construction.
Gene name	Primera	Sequence(5' - 3')
MGG_01282	F	AAAGGAGAGCACCCTCCATTTGGT
MGG_01282	R	CCAATTGCATGTCCCAACGTCGAA
MGG_01282	FLF	TTGGACAACCAAAGAGGGCGAGTA
MGG_01282	FLR	CACGGCGCGCCTAGCAGCGG GCTTGCTCGGTGTTTGGCTGTTAT
MGG_01282	FRF	GCAGGGATGCGGCCGCTGACCATTGCTTATGCCATGCGACTCGT
MGG_01282	FRR	ACCCATCCAGGTCAAAGCTCTCAA
MGG_01282	FC	TTGAACGACTGTTTGCTGGTTCGC
MGG_01282	RC	CTGACGCTCGCTTATGTGTGCAAT
MGG_01282	CP_ADF	GGGGACAAGTTTGTACAAAAAAGCAGGCTTATTGGACAACCAAAGAGGGCGAGTA
MGG_01282	CP_ADR	GGGGACCACTTTGTACAAGAAAGCTGGGTAACGAGTCGCATGGCATAAGCAATG
HPHFb		CCGCTGCTAGGCGCGCCGTGGCTGGAGCTAGTGGAGGTCA
HPHR		GTCAGCGGCCGCATCCCTGCGGTCGGCATCTACTCTATTC
a Primer names indicated as "F" forward intergenic, "R" reverse intergenic,"FLF" forward left flanking, "FLR" reverse left flanking, "FRF" forward right flanking, "FRR" reverse left flanking", "FC" nested forward left flanking, "RC" nested reverse right flanking, "CP_ADF" forward complemetation with gateway recombination site and "CP_ADR" reverse complemetation with gateway recombination site.
b HPHF and HPHR indicate the primer sequences with adaptamers used to amplify the hygromycin phosphotransferase gene.
