# Supplementary material for: Polyubiquitin Is Required for Growth, Development and Pathogenicity in the Rice Blast Fungus Magnaporthe oryzae
Source: PLoS One. 2012 Aug 10;7(8):e42868. doi: 10.1371/journal.pone.0042868 (PMC3416782; doi:10.1371/journal.pone.0042868)
Supplement: Table S2 — List of ubiquitin pathway associated proteins in M.oryzae and gene expression profiling during conidia germination, appressorium formation and under nitrogen starvation. (XLSX) [file pone.0042868.s004.xlsx]

## Sheet: Table S1
Table S2. List of ubiquitin pathway associated proteins in M.oryzae and gene expression profiling during conidia germination, appressorium formation and under nitrogen starvation.
Group	IPR ID	IPR Description	MGG_V6	MGG_Description	SG*	AM	CI	NS12	NS48
UA	IPR000626	Ubiquitin	MGG_01282	ubiquitin (translation) (306 aa)	0.294985	3.69379	2.96915	8.20546	2.42332
UA	IPR003892	Ubiquitin system component Cue	MGG_05379	vacuolar protein sorting-associated protein 9 (translation) (748 aa)	1.23448	1	1.0989	1.12871	1.55259
UA	IPR001012	UBX	MGG_02940	UBX domain-containing protein 8 (translation) (513 aa)	1.27626	0.900735	1.15625	0.90179	1.66733
UA	IPR003892	Ubiquitin system component Cue	MGG_03371	conserved hypothetical protein (translation) (691 aa)	1.36652	0.901899	0.878378	0.942794	1.297
UA	IPR003903	Ubiquitin interacting motif	MGG_09907	ubiquitin carboxyl-terminal hydrolase 13 (translation) (780 aa)	1.37333	1.01786	1.22034	1.69803	0.939954
UA	IPR000626	Ubiquitin	MGG_02970	ubiquitin carboxyl-terminal hydrolase 6 (translation) (558 aa)	1.44739	1.24301	1.21477	0.686774	1.053
UA	IPR000449	Ubiquitin-associated/translation elongation factor EF1B, N-terminal	MGG_06649	EF hand domain-containing protein (translation) (1301 aa)	1.47107	0.795812	1.0687	1.02806	1.18016
UA	IPR003903	Ubiquitin interacting motif	MGG_02535	conserved hypothetical protein (translation) (608 aa)	1.48227	0.977477	1.29911	1.01056	0.970752
UA	IPR000626	Ubiquitin	MGG_08570	tubulin folding cofactor B (translation) (245 aa)	1.50968	0.97318	1.06061	0.831347	0.842505
UA	IPR003903	Ubiquitin interacting motif	MGG_04958	Vacuolar protein sorting-associated protein 27	1.58451	1.16064	1	1.27653	1.1663
UA	IPR000626	Ubiquitin	MGG_04148	conserved hypothetical protein (translation) (158 aa)	1.63415	1.18519	1.53806	1.93707	0.819954
UA	IPR000449	Ubiquitin-associated/translation elongation factor EF1B, N-terminal	MGG_07133	DNA damage-inducible protein 1 (translation) (442 aa)	1.63851	0.965116	1.1163	1.7197	1.16674
UA	IPR003892	Ubiquitin system component Cue	MGG_00818	conserved hypothetical protein (translation) (458 aa)	1.66197	0.949275	0.843137	0.848765	0.935484
UA	IPR001012	UBX	MGG_04552	conserved hypothetical protein (translation) (516 aa)	1.68235	1.18045	1.14706	0.919399	1.88397
UA	IPR001012	UBX	MGG_02734	conserved hypothetical protein (translation) (480 aa)	1.69444	0.772093	0.761905	0.868149	0.705339
UA	IPR003903	Ubiquitin interacting motif	MGG_01751	F-box and WD domain-containing protein (translation) (1270 aa)	1.70482	0.706625	0.773399	0.887097	1.61158
UA	IPR000449	Ubiquitin-associated/translation elongation factor EF1B, N-terminal	MGG_02660	ATP synthase D chain, mitochondrial	1.72131	1.26136	0.438077	1.21121	0.975904
UA	IPR000626	Ubiquitin	MGG_05137	conserved hypothetical protein (translation) (512 aa)	1.84667	1.16279	1.29452	0.913491	1.608
UA	IPR000449	Ubiquitin-associated/translation elongation factor EF1B, N-terminal	MGG_04080	UBA/TS-N domain-containing protein (translation) (908 aa)	1.92623	0.741525	0.749465	1.0629	1.19152
UA	IPR000449	Ubiquitin-associated/translation elongation factor EF1B, N-terminal	MGG_01656	conserved hypothetical protein (translation) (386 aa)	2	0.823394	0.928702	1.02859	1.32346
UA	IPR000626	Ubiquitin	MGG_01656	conserved hypothetical protein (translation) (386 aa)	2	0.823394	0.928702	1.02859	1.32346
UA	IPR003903	Ubiquitin interacting motif	MGG_04616	epsin-1 (translation) (588 aa)	2	1.00326	1.05556	1.19955	0.95244
UA	IPR001012	UBX	MGG_08745	UBX domain-containing protein 2 (translation) (572 aa)	2.02347	1.14251	1	1.09243	0.763174
UA	IPR003903	Ubiquitin interacting motif	MGG_08745	UBX domain-containing protein 2 (translation) (572 aa)	2.02347	1.14251	1	1.09243	0.763174
UA	IPR003903	Ubiquitin interacting motif	MGG_00155	DNA-repair protein rad13 (translation) (1270 aa)	2.02976	0.526639	0.601173	1.83499	1.57855
UA	IPR003903	Ubiquitin interacting motif	MGG_00455	Class E vacuolar protein-sorting machinery protein HSE1	2.05042	1.04444	0.991935	1.21523	0.812914
UA	IPR004854	Ubiquitin fusion degradation protein UFD1	MGG_03175	ubiquitin fusion degradation protein 1 (translation) (380 aa)	2.05229	1.11307	1.2928	1.31498	1.94461
UA	IPR003903	Ubiquitin interacting motif	MGG_04506	26S proteasome non-ATPase regulatory subunit 4 (translation) (295 aa)	2.05641	0.864023	1.02614	0.687017	1.15515
UA	IPR003903	Ubiquitin interacting motif	MGG_08847	tyrosyl-DNA phosphodiesterase domain-containing protein (translation) (653 aa)	2.05797	0.9967	0.921053	1.04359	0.661692
UA	IPR003903	Ubiquitin interacting motif	MGG_08632	predicted protein (translation) (804 aa)	2.08889	0.968504	0.893993	1.10128	1.6
UA	IPR003892	Ubiquitin system component Cue	MGG_00124	conserved hypothetical protein (translation) (952 aa)	2.13625	0.760684	0.939655	0.319308	0.587709
UA	IPR003903	Ubiquitin interacting motif	MGG_03643	conserved hypothetical protein (translation) (1272 aa)	2.225	0.651786	0.528571	2.37224	2.56517
UA	IPR000449	Ubiquitin-associated/translation elongation factor EF1B, N-terminal	MGG_01318	deubiquitination-protection protein dph1 (translation) (419 aa)	2.28846	1.08864	1.01786	1.01245	1.03426
UA	IPR000626	Ubiquitin	MGG_01318	deubiquitination-protection protein dph1 (translation) (419 aa)	2.28846	1.08864	1.01786	1.01245	1.03426
UA	IPR004854	Ubiquitin fusion degradation protein UFD1	MGG_05584	conserved hypothetical protein (translation) (765 aa)	2.34921	0.987654	0.917355	0.792593	1.24689
UA	IPR000626	Ubiquitin	MGG_03163	conserved hypothetical protein (translation) (225 aa)	2.36437	0.883303	0.784205	0.606729	0.861032
UA	IPR000626	Ubiquitin	MGG_05737	conserved hypothetical protein (translation) (110 aa)	2.45038	0.926045	0.861111	1.12076	1.31348
UA	IPR001012	UBX	MGG_06184	conserved hypothetical protein (translation) (317 aa)	2.47826	0.873913	0.95082	0.76164	1.684
UA	IPR001012	UBX	MGG_04882	conserved hypothetical protein (translation) (413 aa)	2.59167	0.98722	0.95	0.805326	1.36883
UA	IPR000449	Ubiquitin-associated/translation elongation factor EF1B, N-terminal	MGG_08270	ubiquitin carboxyl-terminal hydrolase 14 (translation) (788 aa)	2.91124	1.14023	0.99892	1.02669	1.02511
UA	IPR000626	Ubiquitin	MGG_09887	ubiquitin (translation) (78 aa)	2.95618	0.792512	0.683511	1.46538	1.97154
UA	IPR003892	Ubiquitin system component Cue	MGG_02516	conserved hypothetical protein (translation) (470 aa)	3.16429	0.848131	0.939745	0.675284	0.983951
UA	IPR000626	Ubiquitin	MGG_06044	ubiquitin (translation) (130 aa)	4.2	0.7	0.5	0.6	0.9
UA	IPR000626	Ubiquitin	MGG_07928	ubiquitin (translation) (155 aa)	5.91962	0.604027	0.412111	0.439978	0.817856
UA	IPR003892	Ubiquitin system component Cue	MGG_12163	predicted protein (translation) (149 aa)	N/A	N/A	N/A	N/A	N/A
UA	IPR003903	Ubiquitin interacting motif	MGG_14640	mating-type switching protein swi10	N/A	N/A	N/A	N/A	N/A
E1	IPR000594	UBA/THIF-type NAD/FAD binding fold	MGG_05569	molybdenum cofactor synthesis protein 3	1.81188	1.18009	0.930233	1.1729	1.37759
E1	IPR000594	UBA/THIF-type NAD/FAD binding fold	MGG_02856	molybdopterin biosynthesis protein moeB (translation) (525 aa)	1.82222	1.29003	1.14953	0.465866	1.7756
E1	IPR000011	Ubiquitin-activating enzyme, E1-like	MGG_01669	DNA damage tolerance protein rad31 (translation) (446 aa)	1.86598	0.984694	0.907407	0.663849	0.683599
E1	IPR000594	UBA/THIF-type NAD/FAD binding fold	MGG_01669	DNA damage tolerance protein rad31 (translation) (446 aa)	1.86598	0.984694	0.907407	0.663849	0.683599
E1	IPR000127	Ubiquitin-activating enzyme repeat	MGG_06733	SUMO-activating enzyme subunit uba-2 (translation) (685 aa)	2.01429	1.07031	1.13433	2.15789	0.73487
E1	IPR000594	UBA/THIF-type NAD/FAD binding fold	MGG_06733	SUMO-activating enzyme subunit uba-2 (translation) (685 aa)	2.01429	1.07031	1.13433	2.15789	0.73487
E1	IPR000594	UBA/THIF-type NAD/FAD binding fold	MGG_07297	Autophagy-related protein 7	2.10606	2.08856	2.42379	1.43378	1.77403
E1	IPR000594	UBA/THIF-type NAD/FAD binding fold	MGG_01832	NEDD8-activating enzyme E1 regulatory subunit (translation) (546 aa)	2.47561	0.909091	0.77342	1.06385	1.34102
E1	IPR000127	Ubiquitin-activating enzyme repeat	MGG_09283	NEDD8-activating enzyme E1 catalytic subunit (translation) (433 aa)	2.98876	0.738971	0.869565	0.917208	0.846635
E1	IPR000594	UBA/THIF-type NAD/FAD binding fold	MGG_09283	NEDD8-activating enzyme E1 catalytic subunit (translation) (433 aa)	2.98876	0.738971	0.869565	0.917208	0.846635
E1	IPR000011	Ubiquitin-activating enzyme, E1-like	MGG_01409	ubiquitin-activating enzyme E1 1 (translation) (1038 aa)	4.69401	1.00681	1.06269	1.5012	1.98594
E1	IPR000127	Ubiquitin-activating enzyme repeat	MGG_01409	ubiquitin-activating enzyme E1 1 (translation) (1038 aa)	4.69401	1.00681	1.06269	1.5012	1.98594
E1	IPR000594	UBA/THIF-type NAD/FAD binding fold	MGG_01409	ubiquitin-activating enzyme E1 1 (translation) (1038 aa)	4.69401	1.00681	1.06269	1.5012	1.98594
E2	IPR000608	Ubiquitin-conjugating enzyme, E2	MGG_00180	ubiquitin-conjugating enzyme (translation) (167 aa)	1.44278	0.656434	1.17417	0.996482	1.29795
E2	IPR000608	Ubiquitin-conjugating enzyme, E2	MGG_02446	ubiquitin-conjugating enzyme (translation) (300 aa)	1.50446	0.972569	1.48201	1.10301	1.1137
E2	IPR000608	Ubiquitin-conjugating enzyme, E2	MGG_09977	ubiquitin-conjugating enzyme (translation) (271 aa)	1.57795	0.901961	0.941176	1.14177	0.930869
E2	IPR000608	Ubiquitin-conjugating enzyme, E2	MGG_01756	ubiquitin-conjugating enzyme (translation) (155 aa)	1.62097	0.852273	1.15109	0.922043	1.12983
E2	IPR000608	Ubiquitin-conjugating enzyme, E2	MGG_02568	ubiquitin-conjugating enzyme (translation) (151 aa)	1.7772	0.902174	0.817391	1.32518	2.00638
E2	IPR000608	Ubiquitin-conjugating enzyme, E2	MGG_00970	SUMO-conjugating enzyme ubc9 (translation) (158 aa)	1.78161	1.21935	0.966667	1.23338	1.88742
E2	IPR000608	Ubiquitin-conjugating enzyme, E2	MGG_09913	ubiquitin-conjugating enzyme (translation) (156 aa)	1.80822	1.16033	0.937566	1.88446	1.70312
E2	IPR000608	Ubiquitin-conjugating enzyme, E2	MGG_04712	ESCRT-I component (translation) (601 aa)	1.80829	1.2455	1.05405	1.14159	1.21881
E2	IPR000608	Ubiquitin-conjugating enzyme, E2	MGG_14071	ubiquitin-conjugating enzyme (translation) (181 aa)	1.80899	0.88764	0.984127	1.5123	1.28542
E2	IPR000608	Ubiquitin-conjugating enzyme, E2	MGG_06679	conserved hypothetical protein (translation) (1226 aa)	1.86986	1.24815	0.861111	0.737069	0.956522
E2	IPR000608	Ubiquitin-conjugating enzyme, E2	MGG_04081	ubiquitin-conjugating enzyme (translation) (167 aa)	1.92453	0.876448	0.68584	1.29166	0.865744
E2	IPR000608	Ubiquitin-conjugating enzyme, E2	MGG_00600	ubiquitin-conjugating enzyme E2 8 (translation) (190 aa)	1.992	1.03766	1.34513	1.55108	1.36238
E2	IPR000608	Ubiquitin-conjugating enzyme, E2	MGG_01807	NEDD8-conjugating enzyme UBC12 (translation) (185 aa)	2.0355	0.775342	0.57622	2.25838	2.06734
E2	IPR000608	Ubiquitin-conjugating enzyme, E2	MGG_05478	ubiquitin-conjugating enzyme (translation) (240 aa)	2.10435	1.0793	1.16304	0.591652	1.29057
E2	IPR000608	Ubiquitin-conjugating enzyme, E2	MGG_06562	Ubiquitin-conjugating enzyme E2-16 kDa	2.23944	1.16118	1.26522	1.17794	1.3719
E2	IPR000608	Ubiquitin-conjugating enzyme, E2	MGG_04388	conserved hypothetical protein (translation) (120 aa)	2.39423	1.1841	1.10333	1.11488	0.918817
E2	IPR000608	Ubiquitin-conjugating enzyme, E2	MGG_00103	ubiquitin-conjugating enzyme (translation) (170 aa)	2.49275	0.813505	0.587079	0.851852	1.04571
E2	IPR000608	Ubiquitin-conjugating enzyme, E2	MGG_07914	hypothetical protein (translation) (162 aa)	2.86486	0.873112	0.933535	1.09591	1.45046
E2	IPR000608	Ubiquitin-conjugating enzyme, E2	MGG_03728	ubiquitin-conjugating enzyme E2-20 kDa (translation) (182 aa)	3.25728	0.656794	0.892157	0.783294	0.843385
E2	IPR000608	Ubiquitin-conjugating enzyme, E2	MGG_14266	ubiquitin-conjugating enzyme (translation) (261 aa)	N/A	N/A	N/A	N/A	N/A
E2	IPR000608	Ubiquitin-conjugating enzyme, E2	MGG_14784	predicted protein	N/A	N/A	N/A	N/A	N/A
E3	IPR001841	Zinc finger, RING-type	MGG_06342	hypothetical protein (translation) (1019 aa)	0.940426	0.745174	0.973684	0.819266	1.22591
E3	IPR001841	Zinc finger, RING-type	MGG_00730	RING finger protein (translation) (689 aa)	1.0184	0.75	0.718033	1.15611	2.00219
E3	IPR001841	Zinc finger, RING-type	MGG_03256	conserved hypothetical protein (translation) (558 aa)	1.06696	1.00885	1.67788	1.98935	1.43857
E3	IPR001810	F-box domain, cyclin-like	MGG_07785	conserved hypothetical protein (translation) (463 aa)	1.11818	3.51634	10.4062	2.35398	1.26698
E3	IPR000569	HECT	MGG_11888	HECT domain-containing protein (translation) (1286 aa)	1.21854	1.09928	2.22	1.3621	1.26288
E3	IPR001841	Zinc finger, RING-type	MGG_09205	E3 ubiquitin-protein ligase HRD1 (translation) (819 aa)	1.33861	0.693438	1.24421	0.966177	1.98471
E3	IPR001841	Zinc finger, RING-type	MGG_12155	conserved hypothetical protein (translation) (1437 aa)	1.35211	1.11111	1.08108	0.90678	1.1125
E3	IPR001841	Zinc finger, RING-type	MGG_04211	predicted protein (translation) (110 aa)	1.38554	0.909091	1	0.619205	1.00725
E3	IPR000569	HECT	MGG_09504	E3 ubiquitin-protein ligase pub2 (translation) (1143 aa)	1.41786	0.808612	0.897297	1.71508	1.57798
E3	IPR001841	Zinc finger, RING-type	MGG_08561	RING finger and CHY zinc finger domain-containing protein 1 (translation) (679 aa)	1.42771	1.07527	0.85626	1.14965	0.686916
E3	IPR001841	Zinc finger, RING-type	MGG_07164	RING finger domain-containing protein (translation) (352 aa)	1.4491	0.697266	0.897436	1.11628	0.561607
E3	IPR001810	F-box domain, cyclin-like	MGG_10415	predicted protein (translation) (801 aa)	1.48175	1.04739	1.1375	0.741546	1.04878
E3	IPR001810	F-box domain, cyclin-like	MGG_08345	cell division control protein 4 (translation) (1034 aa)	1.53333	1.3007	2.75111	1.70356	1.53725
E3	IPR001841	Zinc finger, RING-type	MGG_09658	conserved hypothetical protein (translation) (178 aa)	1.57647	0.942529	1.14286	0.619289	0.872576
E3	IPR000569	HECT	MGG_07255	E3 ubiquitin-protein ligase pub1 (translation) (804 aa)	1.58232	1.01274	1.28571	1.58248	2.07253
E3	IPR001841	Zinc finger, RING-type	MGG_02960	pre-mRNA-splicing factor cwc24 (translation) (336 aa)	1.58904	1.03704	0.767442	0.7277	0.952128
E3	IPR003613	U box domain	MGG_03116	spliceosome component (translation) (495 aa)	1.59211	0.773779	1.04651	0.543246	0.818408
E3	IPR001810	F-box domain, cyclin-like	MGG_09760	conserved hypothetical protein (translation) (393 aa)	1.59763	1.01274	0.639706	0.998847	0.300054
E3	IPR001841	Zinc finger, RING-type	MGG_06087	conserved hypothetical protein (translation) (634 aa)	1.5989	1.10174	0.981308	1.14286	1.25364
E3	IPR001841	Zinc finger, RING-type	MGG_01238	conserved hypothetical protein (translation) (1724 aa)	1.60475	1.15083	0.816667	1.1029	1.53981
E3	IPR001810	F-box domain, cyclin-like	MGG_04395	F-box domain-containing protein (translation) (1350 aa)	1.61111	0.982143	1.01538	2.05394	2.38732
E3	IPR001841	Zinc finger, RING-type	MGG_00145	RING-1 protein (translation) (397 aa)	1.62037	1.02051	1.09091	1.15842	0.579655
E3	IPR001810	F-box domain, cyclin-like	MGG_13493	F-box protein (translation) (561 aa)	1.63333	1.03571	0.97619	1.70642	0.495595
E3	IPR001841	Zinc finger, RING-type	MGG_07155	transcription termination factor 2 (translation) (1107 aa)	1.64198	1.3	1.28358	1.32151	2.00342
E3	IPR001810	F-box domain, cyclin-like	MGG_13435	sulfur controller 2 (translation) (677 aa)	1.64444	1.06757	1.06383	0.861111	1.2451
E3	IPR001841	Zinc finger, RING-type	MGG_00859	ariadne-1 (translation) (523 aa)	1.65116	1.1145	2.09434	1.09091	0.854962
E3	IPR001841	Zinc finger, RING-type	MGG_13171	E3 ubiquitin-protein ligase ubr1 (translation) (2133 aa)	1.65957	0.788184	0.809231	1.27045	1.57457
E3	IPR003126	Zinc finger, N-recognin	MGG_13171	E3 ubiquitin-protein ligase ubr1 (translation) (2133 aa)	1.65957	0.788184	0.809231	1.27045	1.57457
E3	IPR001841	Zinc finger, RING-type	MGG_11362	hypothetical protein (translation) (510 aa)	1.66304	1.23446	1.71918	1.76068	1.5636
E3	IPR001841	Zinc finger, RING-type	MGG_04663	binding / zinc ion binding (translation) (388 aa)	1.67308	0.958678	1.02817	1.03201	1.16055
E3	IPR001841	Zinc finger, RING-type	MGG_11047	DNA repair and recombination protein RAD5C (translation) (954 aa)	1.67925	0.88172	0.7	1.02128	3.92045
E3	IPR001810	F-box domain, cyclin-like	MGG_06215	conserved hypothetical protein (translation) (355 aa)	1.68182	0.8125	0.755274	0.56	1.11957
E3	IPR001810	F-box domain, cyclin-like	MGG_00768	conserved hypothetical protein (translation) (706 aa)	1.70423	1.01481	1.10256	2.17989	3.42712
E3	IPR001841	Zinc finger, RING-type	MGG_08571	RING-7 protein (translation) (527 aa)	1.71698	1.01508	1.21538	1.00685	0.598684
E3	IPR001810	F-box domain, cyclin-like	MGG_13129	conserved hypothetical protein (translation) (553 aa)	1.72	2.47143	0.663043	1.30642	1.42239
E3	IPR001810	F-box domain, cyclin-like	MGG_06117	conserved hypothetical protein (translation) (1040 aa)	1.7234	1.00521	1.21569	1.77595	1.86816
E3	IPR001810	F-box domain, cyclin-like	MGG_05866	predicted protein (translation) (514 aa)	1.73134	0.883871	1.06522	0.721408	0.868852
E3	IPR001810	F-box domain, cyclin-like	MGG_06372	F-box/WD repeat-containing protein 7 (translation) (653 aa)	1.73239	1.03676	2.03943	1.27864	2.79592
E3	IPR001810	F-box domain, cyclin-like	MGG_13660	F-box domain-containing protein (translation) (366 aa)	1.7439	0.974026	0.908163	1.03837	1.33884
E3	IPR001810	F-box domain, cyclin-like	MGG_07448	conserved hypothetical protein (translation) (322 aa)	1.75	1.08163	0.853659	0.710037	1.14881
E3	IPR001841	Zinc finger, RING-type	MGG_01987	conserved hypothetical protein (translation) (850 aa)	1.7561	1	0.969128	0.705645	0.900744
E3	IPR000569	HECT	MGG_03841	E3 ubiquitin-protein ligase UPL3 (translation) (1924 aa)	1.78151	1.07692	1.2043	1.70539	0.975911
E3	IPR003613	U box domain	MGG_08035	E3 ubiquitin-protein ligase CHIP (translation) (285 aa)	1.79592	1.25	1.73684	0.884873	0.744224
E3	IPR001841	Zinc finger, RING-type	MGG_00139	E3 ubiquitin-protein ligase bre-1 (translation) (706 aa)	1.80247	0.75162	0.860465	0.97746	1.3065
E3	IPR001841	Zinc finger, RING-type	MGG_05532	predicted protein (translation) (476 aa)	1.80435	1.10588	0.981818	2.33594	0.93617
E3	IPR001373	Cullin, N-terminal	MGG_07145	cullin-1 (translation) (752 aa)	1.82237	1.3114	1.66238	1.51824	1.83261
E3	IPR001373	Cullin, N-terminal	MGG_07731	cullin-3 (translation) (831 aa)	1.83721	0.925532	1.05714	1.49554	0.923077
E3	IPR001841	Zinc finger, RING-type	MGG_00655	peroxisomal biogenesis factor 2 (translation) (499 aa)	1.8427	0.951049	1.08537	0.931818	1.26359
E3	IPR001841	Zinc finger, RING-type	MGG_07487	ATP-dependent DNA helicase (translation) (1389 aa)	1.88274	0.947883	0.782345	1.06318	0.94738
E3	IPR001810	F-box domain, cyclin-like	MGG_13065	SCF E3 ubiquitin ligase complex F-box protein grrA (translation) (735 aa)	1.89474	1.70345	1.94382	1.275	1.1374
E3	IPR001841	Zinc finger, RING-type	MGG_03294	IBR domain protein (translation) (610 aa)	1.89778	1.06754	0.969697	0.900641	0.832215
E3	IPR001841	Zinc finger, RING-type	MGG_10932	conserved hypothetical protein (translation) (185 aa)	1.90777	1.0122	0.396304	0.851852	1.13704
E3	IPR003126	Zinc finger, N-recognin	MGG_08121	conserved hypothetical protein (translation) (538 aa)	1.91892	0.905405	0.733333	0.783307	1.32704
E3	IPR003613	U box domain	MGG_03255	ubiquitin conjugation factor E4 (translation) (1128 aa)	1.91892	0.90625	1.01485	1.05875	0.756873
E3	IPR001810	F-box domain, cyclin-like	MGG_08019	F-box domain-containing protein (translation) (341 aa)	1.94118	3.49807	16.2191	0.464572	0.241285
E3	IPR001841	Zinc finger, RING-type	MGG_10526	conserved hypothetical protein (translation) (1635 aa)	1.94406	0.760274	0.907534	0.957219	1.31899
E3	IPR001841	Zinc finger, RING-type	MGG_06094	DNA repair protein RAD5 (translation) (894 aa)	1.95652	1.08889	0.972222	0.859615	0.966038
E3	IPR001810	F-box domain, cyclin-like	MGG_00261	conserved hypothetical protein (translation) (855 aa)	1.96296	0.87156	1	0.779715	1.20611
E3	IPR001232	SKP1 component	MGG_04978	S-phase kinase-associated protein 1A (translation) (169 aa)	2	1.07917	1.16691	1.40034	1.46774
E3	IPR001810	F-box domain, cyclin-like	MGG_09240	F-box domain-containing protein (translation) (643 aa)	2.01562	0.958159	0.829684	2.53374	1.56662
E3	IPR001841	Zinc finger, RING-type	MGG_02839	IBR domain-containing protein (translation) (813 aa)	2.02222	1.04706	1	4.30303	3.44286
E3	IPR000569	HECT	MGG_01115	ubiquitin-protein ligase E3A (translation) (1366 aa)	2.0241	1.21687	1.93889	1.10256	1.19048
E3	IPR001810	F-box domain, cyclin-like	MGG_07421	predicted protein (translation) (355 aa)	2.03846	0.93617	1.03448	0.949802	0.832413
E3	IPR001841	Zinc finger, RING-type	MGG_01240	RING-8 protein (translation) (481 aa)	2.0387	0.80102	1.367	1.86288	1.43616
E3	IPR001841	Zinc finger, RING-type	MGG_06634	predicted protein (translation) (438 aa)	2.05785	0.971429	1.07143	1.44213	1.08584
E3	IPR001841	Zinc finger, RING-type	MGG_07014	DNA repair protein RAD16 (translation) (989 aa)	2.0625	0.855072	0.851852	1.47651	1.19853
E3	IPR001841	Zinc finger, RING-type	MGG_02984	RING-9 protein (translation) (851 aa)	2.06944	1.23418	1.54082	1.96475	1.749
E3	IPR001841	Zinc finger, RING-type	MGG_01327	conserved hypothetical protein (translation) (470 aa)	2.09589	1.17007	1.82895	2.41218	0.753061
E3	IPR001841	Zinc finger, RING-type	MGG_06430	conserved hypothetical protein (translation) (529 aa)	2.14583	1.19718	0.872727	1.97328	1.01156
E3	IPR001373	Cullin, N-terminal	MGG_04724	anaphase-promoting complex subunit 2 (translation) (966 aa)	2.18033	0.776923	0.88	0.800908	0.824752
E3	IPR001841	Zinc finger, RING-type	MGG_05032	DNA repair protein RAD5 (translation) (1167 aa)	2.20238	1.08125	0.985849	1.04876	0.80432
E3	IPR000569	HECT	MGG_03252	E3 ubiquitin-protein ligase ptr1 + RNA transport protein 1 (translation) (4049 aa)	2.25714	0.93578	0.957895	0.862858	0.760354
E3	IPR001841	Zinc finger, RING-type	MGG_03582	RING-14 protein (translation) (462 aa)	2.29412	1.55901	0.790123	1.58957	2.03409
E3	IPR001810	F-box domain, cyclin-like	MGG_09696	conserved hypothetical protein (translation) (1065 aa)	2.33065	1.01766	1.38593	1.05347	0.978799
E3	IPR001810	F-box domain, cyclin-like	MGG_01077	predicted protein (translation) (425 aa)	2.34737	0.947368	1.04248	1.63724	2.07914
E3	IPR001841	Zinc finger, RING-type	MGG_03283	vacuolar membrane protein (translation) (1009 aa)	2.67722	0.922252	1.0432	1.12903	0.827341
E3	IPR001841	Zinc finger, RING-type	MGG_03313	vacuolar assembly protein (translation) (1358 aa)	3.03415	0.84466	1.14529	1.28804	1.32679
E3	IPR001841	Zinc finger, RING-type	MGG_03605	CDK-activating kinase assembly factor MAT1 (translation) (368 aa)	3.63889	0.871886	1.08772	1.70806	1.48135
E3	IPR001841	Zinc finger, RING-type	MGG_00988	RING finger protein 10 (translation) (671 aa)	3.8	0.907895	0.936508	1.09091	0.97599
E3	IPR001841	Zinc finger, RING-type	MGG_08165	transmembrane E3 ubiquitin-protein ligase 1 (translation) (877 aa)	5.93197	0.845597	1.14062	0.930799	0.666331
E3	IPR001373	Cullin, N-terminal	MGG_14763	cullin-4B	N/A	N/A	N/A	N/A	N/A
E3	IPR001810	F-box domain, cyclin-like	MGG_11604	conserved hypothetical protein (translation) (467 aa)	N/A	N/A	N/A	N/A	N/A
E3	IPR001810	F-box domain, cyclin-like	MGG_14702	conserved hypothetical protein	N/A	N/A	N/A	N/A	N/A
E3	IPR001810	F-box domain, cyclin-like	MGG_14934	hypothetical protein	N/A	N/A	N/A	N/A	N/A
E3	IPR001810	F-box domain, cyclin-like	MGG_15098	predicted protein	N/A	N/A	N/A	N/A	N/A
E3	IPR001841	Zinc finger, RING-type	MGG_04088	anaphase-promoting complex subunit 11 (translation) (105 aa)	N/A	N/A	N/A	N/A	N/A
E3	IPR001841	Zinc finger, RING-type	MGG_08844	RING-box protein 1 (translation) (120 aa)	N/A	N/A	N/A	N/A	N/A
E3	IPR001841	Zinc finger, RING-type	MGG_11229	conserved hypothetical protein (translation) (796 aa)	N/A	N/A	N/A	N/A	N/A
E3	IPR001841	Zinc finger, RING-type	MGG_12631	DNA repair protein RAD5 (translation) (1150 aa)	N/A	N/A	N/A	N/A	N/A
E3	IPR001841	Zinc finger, RING-type	MGG_12793	DNA repair and recombination protein RAD5C (translation) (820 aa)	N/A	N/A	N/A	N/A	N/A
E3	IPR001841	Zinc finger, RING-type	MGG_12816	conserved hypothetical protein (translation) (198 aa)	N/A	N/A	N/A	N/A	N/A
E3	IPR001841	Zinc finger, RING-type	MGG_12869	RING finger domain-containing protein (translation) (917 aa)	N/A	N/A	N/A	N/A	N/A
E3	IPR001841	Zinc finger, RING-type	MGG_13816	conserved hypothetical protein (translation) (258 aa)	N/A	N/A	N/A	N/A	N/A
E3	IPR001841	Zinc finger, RING-type	MGG_14046	conserved hypothetical protein (translation) (145 aa)	N/A	N/A	N/A	N/A	N/A
E3	IPR001841	Zinc finger, RING-type	MGG_14789	predicted protein	N/A	N/A	N/A	N/A	N/A
DUB	IPR001394	Peptidase C19, ubiquitin carboxyl-terminal hydrolase 2	MGG_09907	ubiquitin carboxyl-terminal hydrolase 13 (translation) (780 aa)	1.37333	1.01786	1.22034	1.69803	0.939954
DUB	IPR001394	Peptidase C19, ubiquitin carboxyl-terminal hydrolase 2	MGG_02970	ubiquitin carboxyl-terminal hydrolase 6 (translation) (558 aa)	1.44739	1.24301	1.21477	0.686774	1.053
DUB	IPR001394	Peptidase C19, ubiquitin carboxyl-terminal hydrolase 2	MGG_08638	ubiquitin C-terminal hydrolase family protein (translation) (871 aa)	1.59794	3.35776	1.19048	1.5949	1.16436
DUB	IPR001394	Peptidase C19, ubiquitin carboxyl-terminal hydrolase 2	MGG_03527	ubiquitin carboxyl-terminal hydrolase 22 (translation) (534 aa)	1.60825	0.867925	0.768657	1.01272	1.30123
DUB	IPR001394	Peptidase C19, ubiquitin carboxyl-terminal hydrolase 2	MGG_04031	conserved hypothetical protein (translation) (741 aa)	1.64	0.824468	0.915254	0.8	1.49596
DUB	IPR001394	Peptidase C19, ubiquitin carboxyl-terminal hydrolase 2	MGG_04957	ubiquitin carboxyl-terminal hydrolase 2 (translation) (1037 aa)	1.73077	1.19048	1.09091	0.656463	1.03623
DUB	IPR001394	Peptidase C19, ubiquitin carboxyl-terminal hydrolase 2	MGG_04494	conserved hypothetical protein (translation) (667 aa)	1.73158	1.17288	1.17153	0.955728	0.703575
DUB	IPR001394	Peptidase C19, ubiquitin carboxyl-terminal hydrolase 2	MGG_08169	U4/U6.U5 tri-snRNP-associated protein 2 (translation) (557 aa)	1.76596	0.978022	0.732804	0.975309	0.930556
DUB	IPR001607	Zinc finger, UBP-type	MGG_08169	U4/U6.U5 tri-snRNP-associated protein 2 (translation) (557 aa)	1.76596	0.978022	0.732804	0.975309	0.930556
DUB	IPR001394	Peptidase C19, ubiquitin carboxyl-terminal hydrolase 2	MGG_05996	ubiquitin carboxyl-terminal hydrolase 10 (translation) (971 aa)	1.775	1.52899	0.85	0.900538	1.33495
DUB	IPR001394	Peptidase C19, ubiquitin carboxyl-terminal hydrolase 2	MGG_05666	ubiquitin carboxyl-terminal hydrolase 15 (translation) (1554 aa)	1.8949	0.693356	1.36881	0.775244	1.43969
DUB	IPR001578	Peptidase C12, ubiquitin carboxyl-terminal hydrolase 1	MGG_06319	ubiquitin carboxyl-terminal hydrolase (translation) (253 aa)	1.94286	0.974194	1.07143	0.613223	1.53012
DUB	IPR001394	Peptidase C19, ubiquitin carboxyl-terminal hydrolase 2	MGG_00877	conserved hypothetical protein (translation) (1283 aa)	1.9878	0.919786	0.992933	1.00958	1.58541
DUB	IPR001394	Peptidase C19, ubiquitin carboxyl-terminal hydrolase 2	MGG_07468	ubiquitin carboxyl-terminal hydrolase 21 (translation) (1180 aa)	2.06358	0.848806	0.917614	0.755317	0.754347
DUB	IPR001578	Peptidase C12, ubiquitin carboxyl-terminal hydrolase 1	MGG_01683	ubiquitin carboxyl-terminal hydrolase (translation) (253 aa)	2.39207	0.824324	0.791045	0.934992	0.54359
DUB	IPR001394	Peptidase C19, ubiquitin carboxyl-terminal hydrolase 2	MGG_05002	ubiquitin carboxyl-terminal hydrolase (translation) (2567 aa)	2.59615	0.992	0.825688	1.95349	1.64644
DUB	IPR001578	Peptidase C12, ubiquitin carboxyl-terminal hydrolase 1	MGG_03513	ubiquitin carboxyl-terminal hydrolase (translation) (445 aa)	2.7561	0.859813	0.797101	1.65333	1.34532
DUB	IPR001394	Peptidase C19, ubiquitin carboxyl-terminal hydrolase 2	MGG_08270	ubiquitin carboxyl-terminal hydrolase 14 (translation) (788 aa)	2.91124	1.14023	0.99892	1.02669	1.02511
DUB	IPR001607	Zinc finger, UBP-type	MGG_08270	ubiquitin carboxyl-terminal hydrolase 14 (translation) (788 aa)	2.91124	1.14023	0.99892	1.02669	1.02511
DUB	IPR001578	Peptidase C12, ubiquitin carboxyl-terminal hydrolase 1	MGG_11771	ubiquitin carboxyl-terminal hydrolase 2 (translation) (329 aa)	3.45082	0.781638	0.932398	0.581192	2.0257
DUB	IPR001394	Peptidase C19, ubiquitin carboxyl-terminal hydrolase 2	MGG_14680	PAB-dependent poly(A)-specific ribonuclease subunit PAN2	N/A	N/A	N/A	N/A	N/A
DUB	IPR001607	Zinc finger, UBP-type	MGG_11239	RING finger protein (translation) (753 aa)	N/A	N/A	N/A	N/A	N/A
*Abbreviations indicate particular expression profiles: SG, spore germination; GE, germ tube elongation; AM,appressorium maturation; CI, cAMP induced appressorium; NS12, nitrogen starvation for 12hr; NS48; nitrogen starvation for 48hr. See References 13 and 19 for a detailed description of the experimental conditions. N/A indicates no values.
