# Supplementary material for: Polyubiquitin Is Required for Growth, Development and Pathogenicity in the Rice Blast Fungus Magnaporthe oryzae
Source: PLoS One. 2012 Aug 10;7(8):e42868. doi: 10.1371/journal.pone.0042868 (PMC3416782; doi:10.1371/journal.pone.0042868)
Supplement: Table S3 — List of putative ubiquitinated proteins during nitrogen starvation in M. oryzae . (XLSX) [file pone.0042868.s005.xlsx]

## Sheet: Sheet1
Table S3. List of putative ubiquitinated proteins during nitrogen starvation in M. oryzae.
Function	Sequence ID	Sequence Name
translation
	MGG_11776	40s ribosomal protein s0
	MGG_16248	40s ribosomal protein s2
	MGG_03372	40S ribosomal protein S20
	MGG_06479	40S ribosomal protein S22
	MGG_01066	40S ribosomal protein S23
	MGG_02747	40S ribosomal protein S4
	MGG_16204	60s ribosomal protein l12
	MGG_04484	60S ribosomal protein L18
	MGG_13782	60s ribosomal protein l19
	MGG_06721	60s ribosomal protein l28
	MGG_03193	60S ribosomal protein L3
	MGG_00546	60s ribosomal protein l44
	MGG_05237	60S ribosomal protein L7
	MGG_04829	60S ribosomal protein L9
	MGG_07033	ATP-dependent RNA helicase DED1
	MGG_04400	ATP-dependent RNA helicase eIF4A
	MGG_06936	elongation factor 1-gamma
	MGG_01742	elongation factor 2
	MGG_03641	elongation factor 1-alpha
metabolic process
	MGG_06712	5-methyltetrahydropteroyltriglutamate-homocysteine methyltransferase
	MGG_05949	acyl-CoA dehydrogenase
	MGG_06719	ATP-citrate synthase subunit 1
	MGG_06720	ATP-citrate synthase subunit 2
	MGG_07202	citrate synthase
	MGG_04118	fatty acid synthase beta subunit dehydratase
	MGG_11597	glucosamine-fructose-6-phosphate aminotransferase
	MGG_06011	glutathione-dependent formaldehyde dehydrogenase
	MGG_00383	s-adenosylmethionine synthetase
	MGG_12805	tryptophan synthase
	MGG_00168	succinate dehydrogenase flavoprotein subunit
transport
	MGG_11754	ABC transporter
	MGG_16149	ADP, ATP carrier protein
	MGG_00289	amino-acid permease inda1
	MGG_02072	amino-acid permease inda1
	MGG_05128	dicarboxylic amino acid permease
	MGG_13793	nitrate transporter
	MGG_04248	oligopeptide transporter
	MGG_07200	plasma membrane ATPase
	MGG_06362	small COPII coat GTPase
protein modification process
	MGG_01282	polyubiquitin
	MGG_07928	ubiquitin-40S ribosomal protein S27a
	MGG_06044	ubiquitin-60S ribosomal protein L40
	MGG_00970	ubiquitin-conjugating enzyme E2
	MGG_07255	E3 ubiquitin-protein ligase hulA
	MGG_07120	26S proteasome regulatory subunit rpn-1
cell signaling
	MGG_01588	14-3-3 protein
	MGG_13806	14-3-3 protein
	MGG_04719	WD repeat-containing protein 38
	MGG_01045	carbon catabolite repression protein
cellular component organization
	MGG_03982	actin
	MGG_00604	beta-tubulin
	MGG_11412	tubulin alpha chain
	MGG_06650	tubulin alpha-B chain
organelle organization
	MGG_01160	histone H4
	MGG_06293	histone H4
response to stress
	MGG_13239	fatty acid oxygenase
	MGG_06759	heat shock protein 90
	MGG_06958	heat shock protein 70
other
	MGG_06496	RNA binding protein Scp160
	MGG_07752	ATP synthase subunit alpha
	MGG_10327	ATPase
	MGG_03494	aminotransferase
	MGG_08059	hypothetical protein
